# Supplementary material
Source: bioRxiv or medRxiv preprint supplement (http://medrxiv.stage.highwire.org/highwire/filestream/92187/field_highwire_adjunct_files/0/2020.08.02.20166751-1.pdf)

# Gender distribution over time (months)

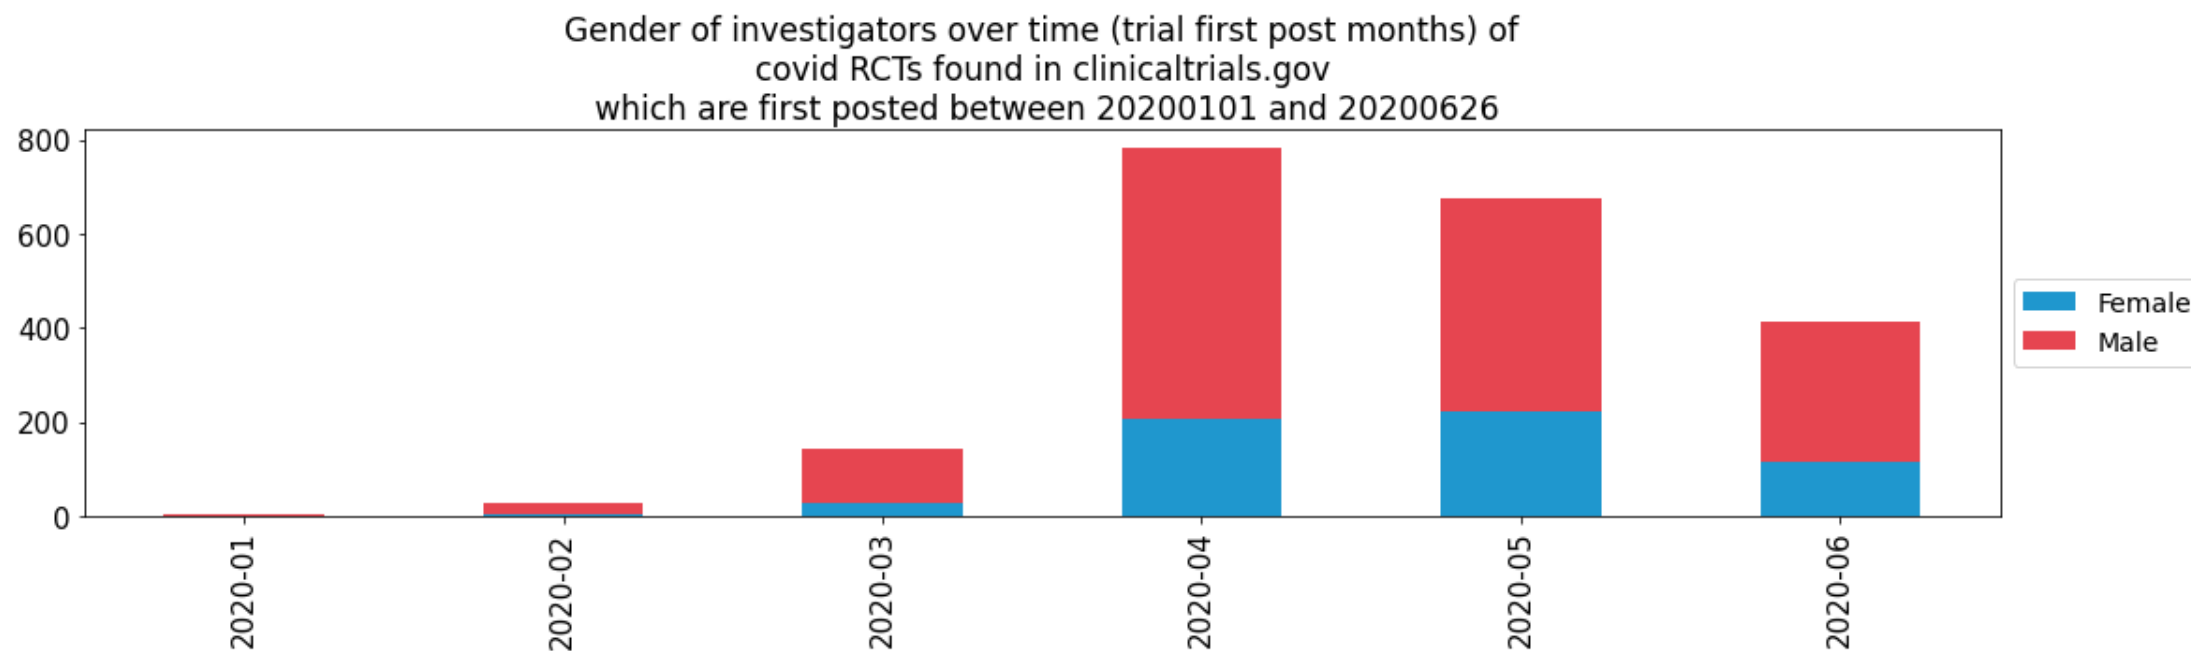

# Flow diagrams

## – study selection

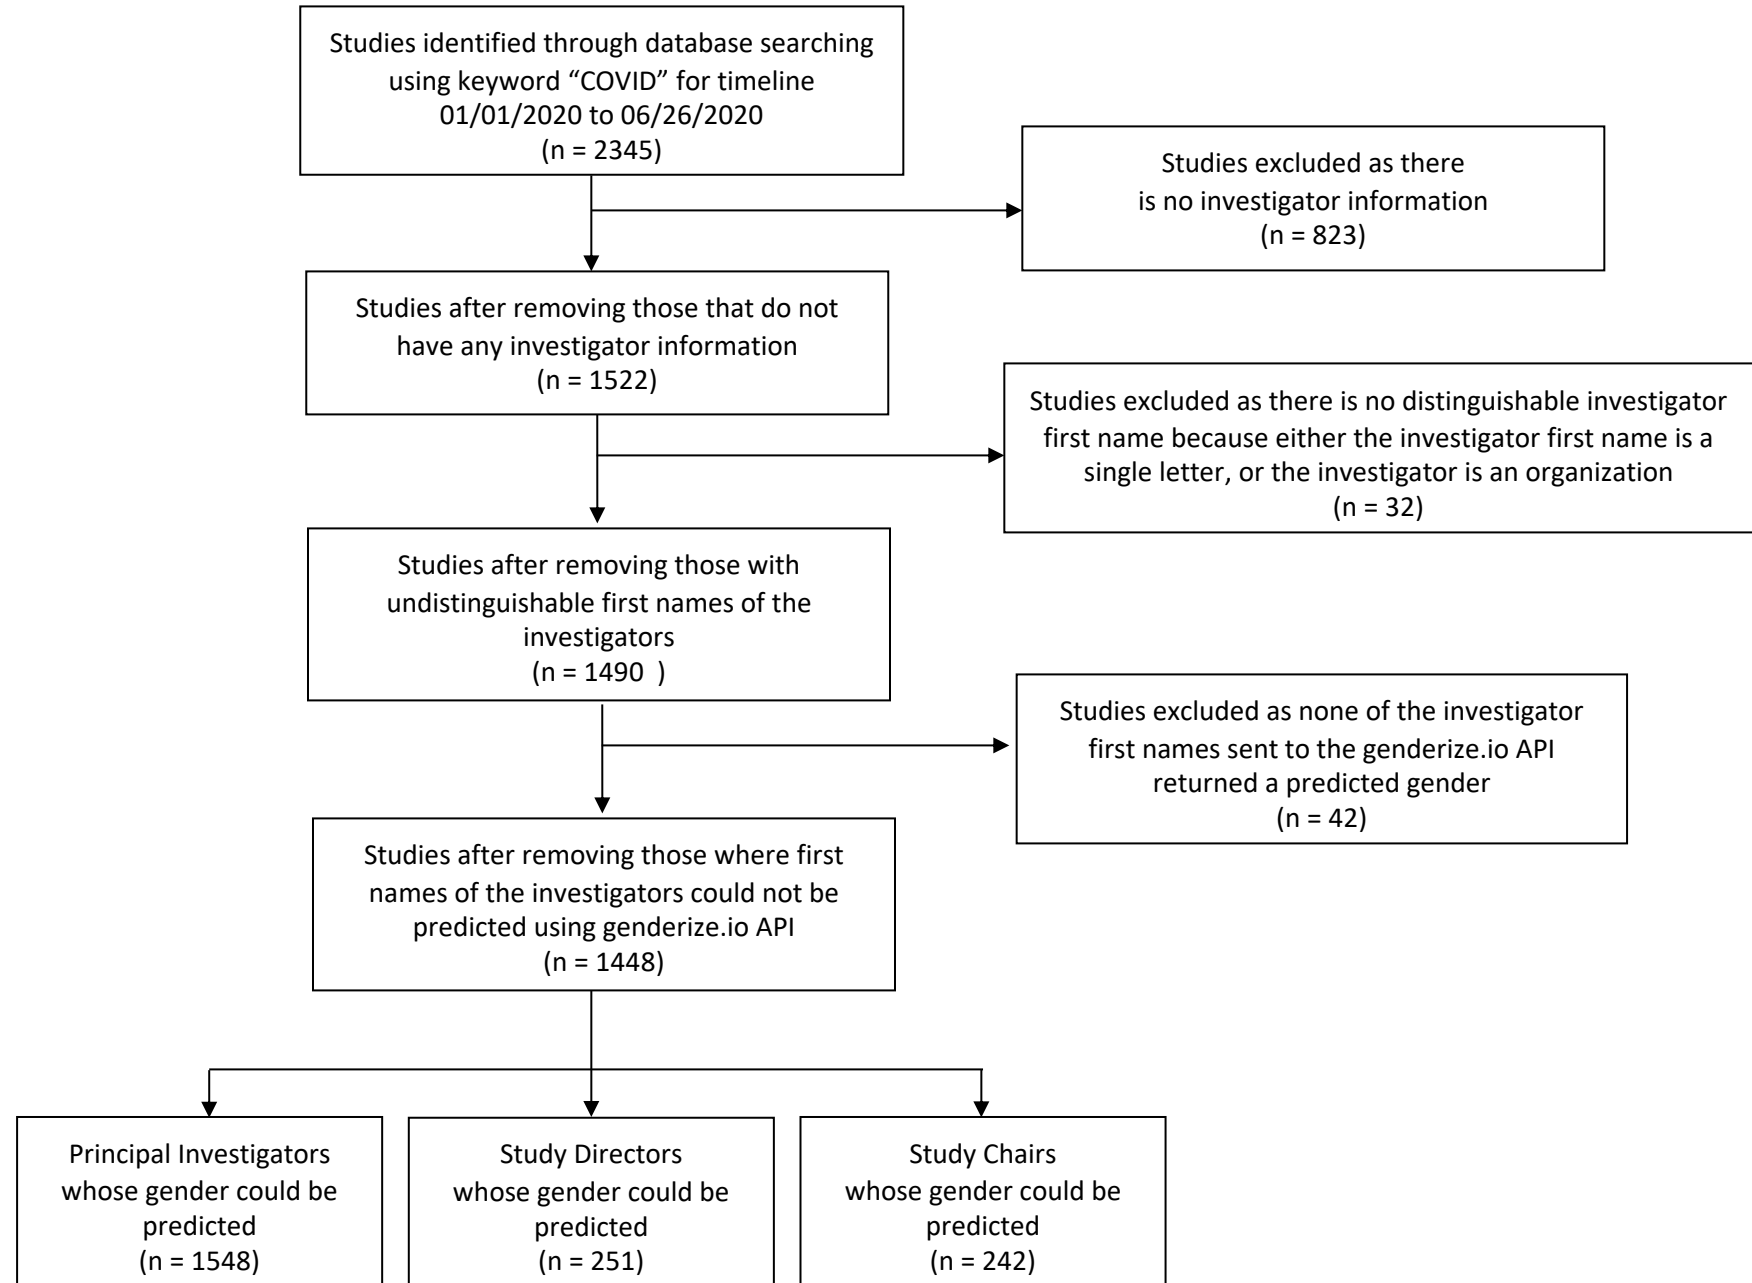

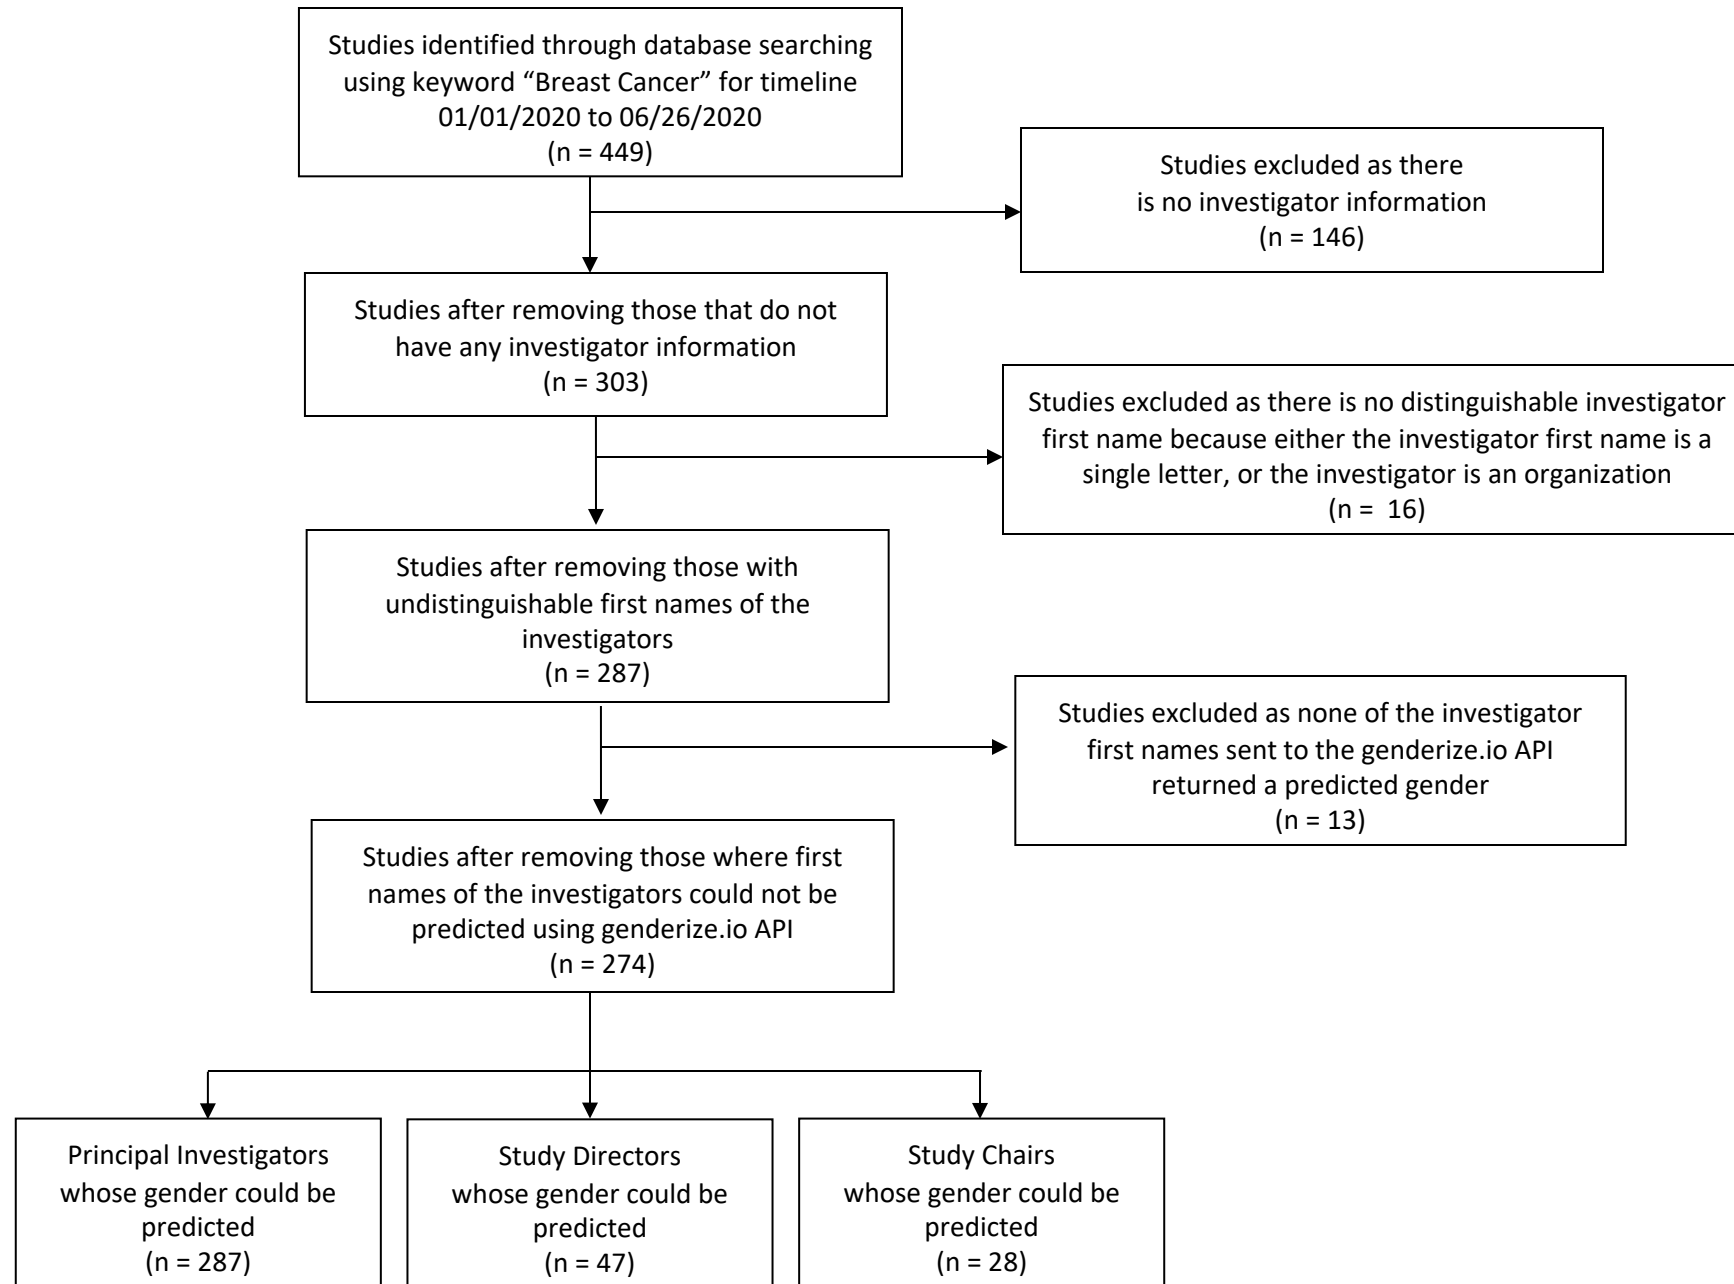

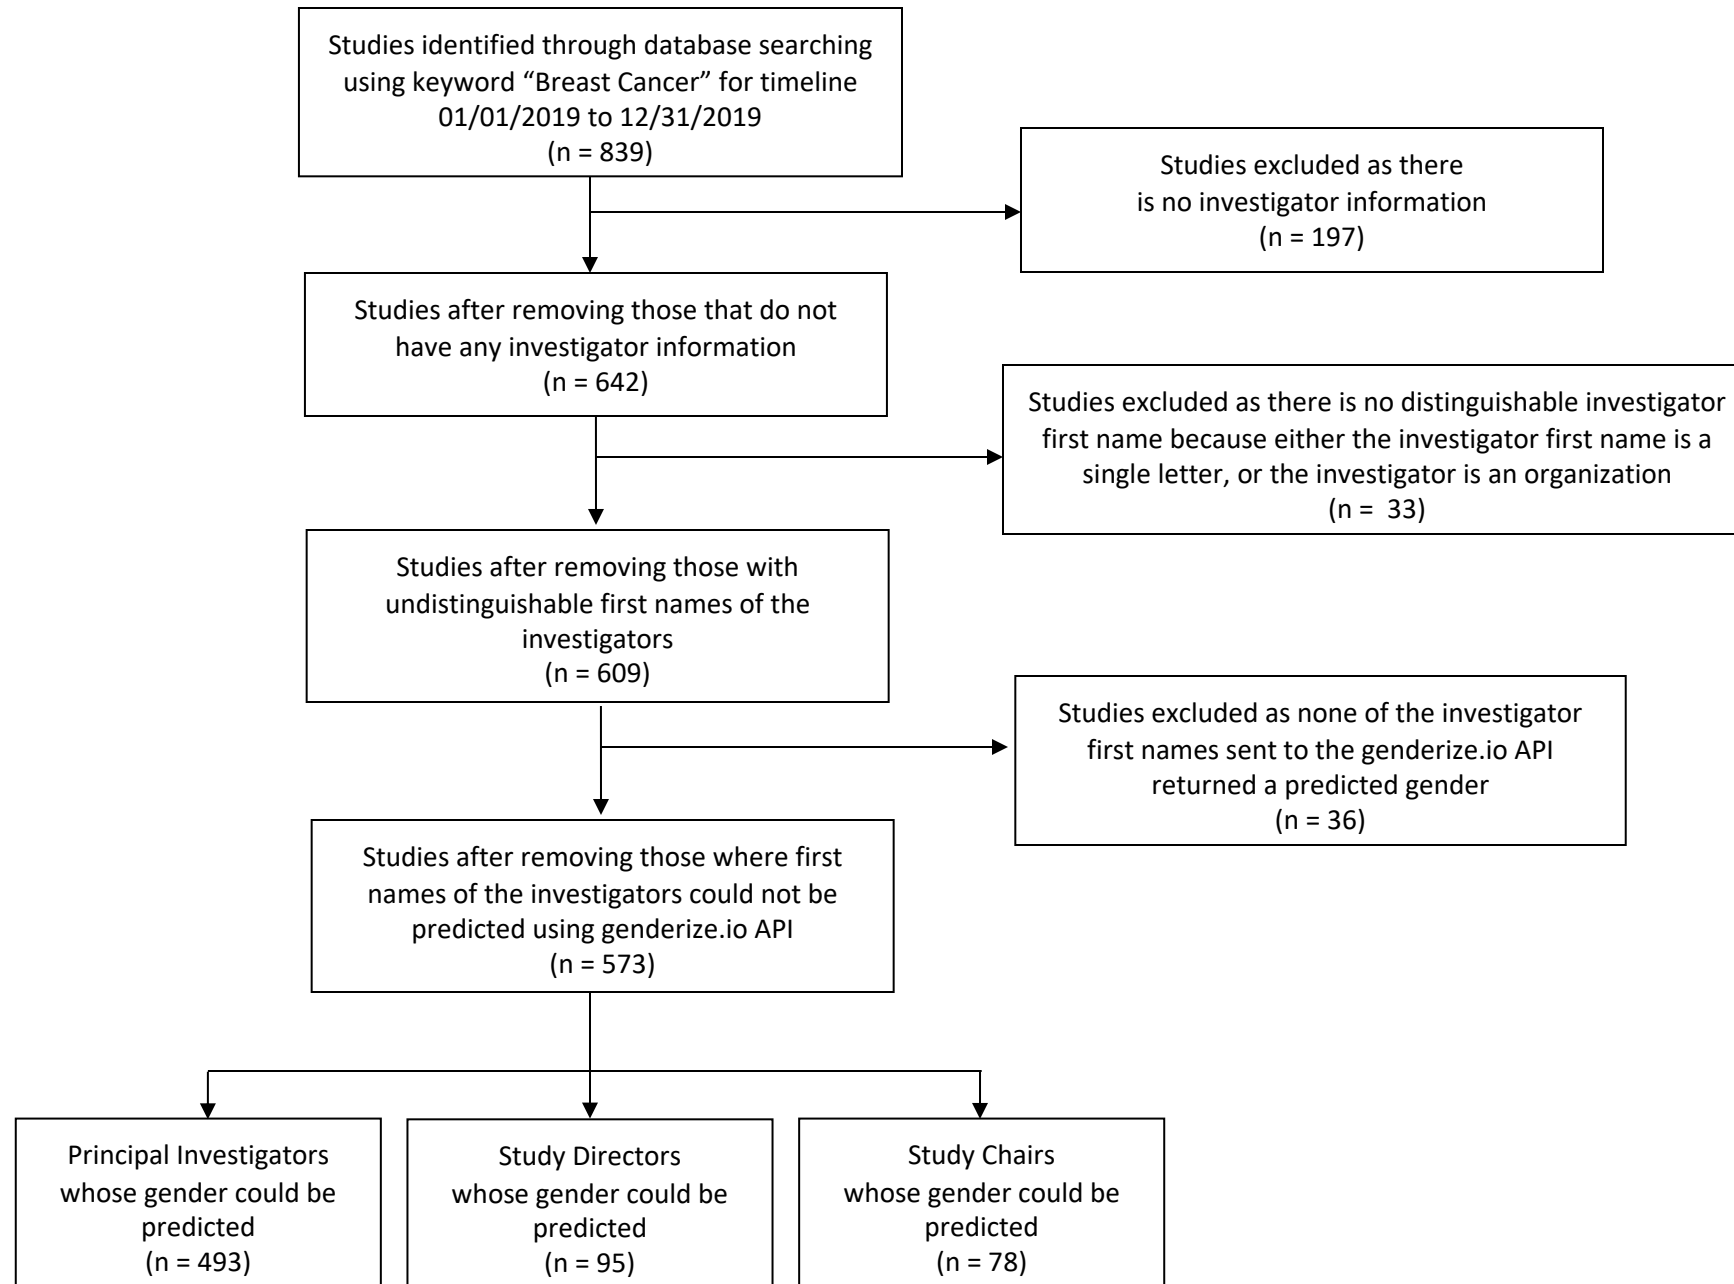

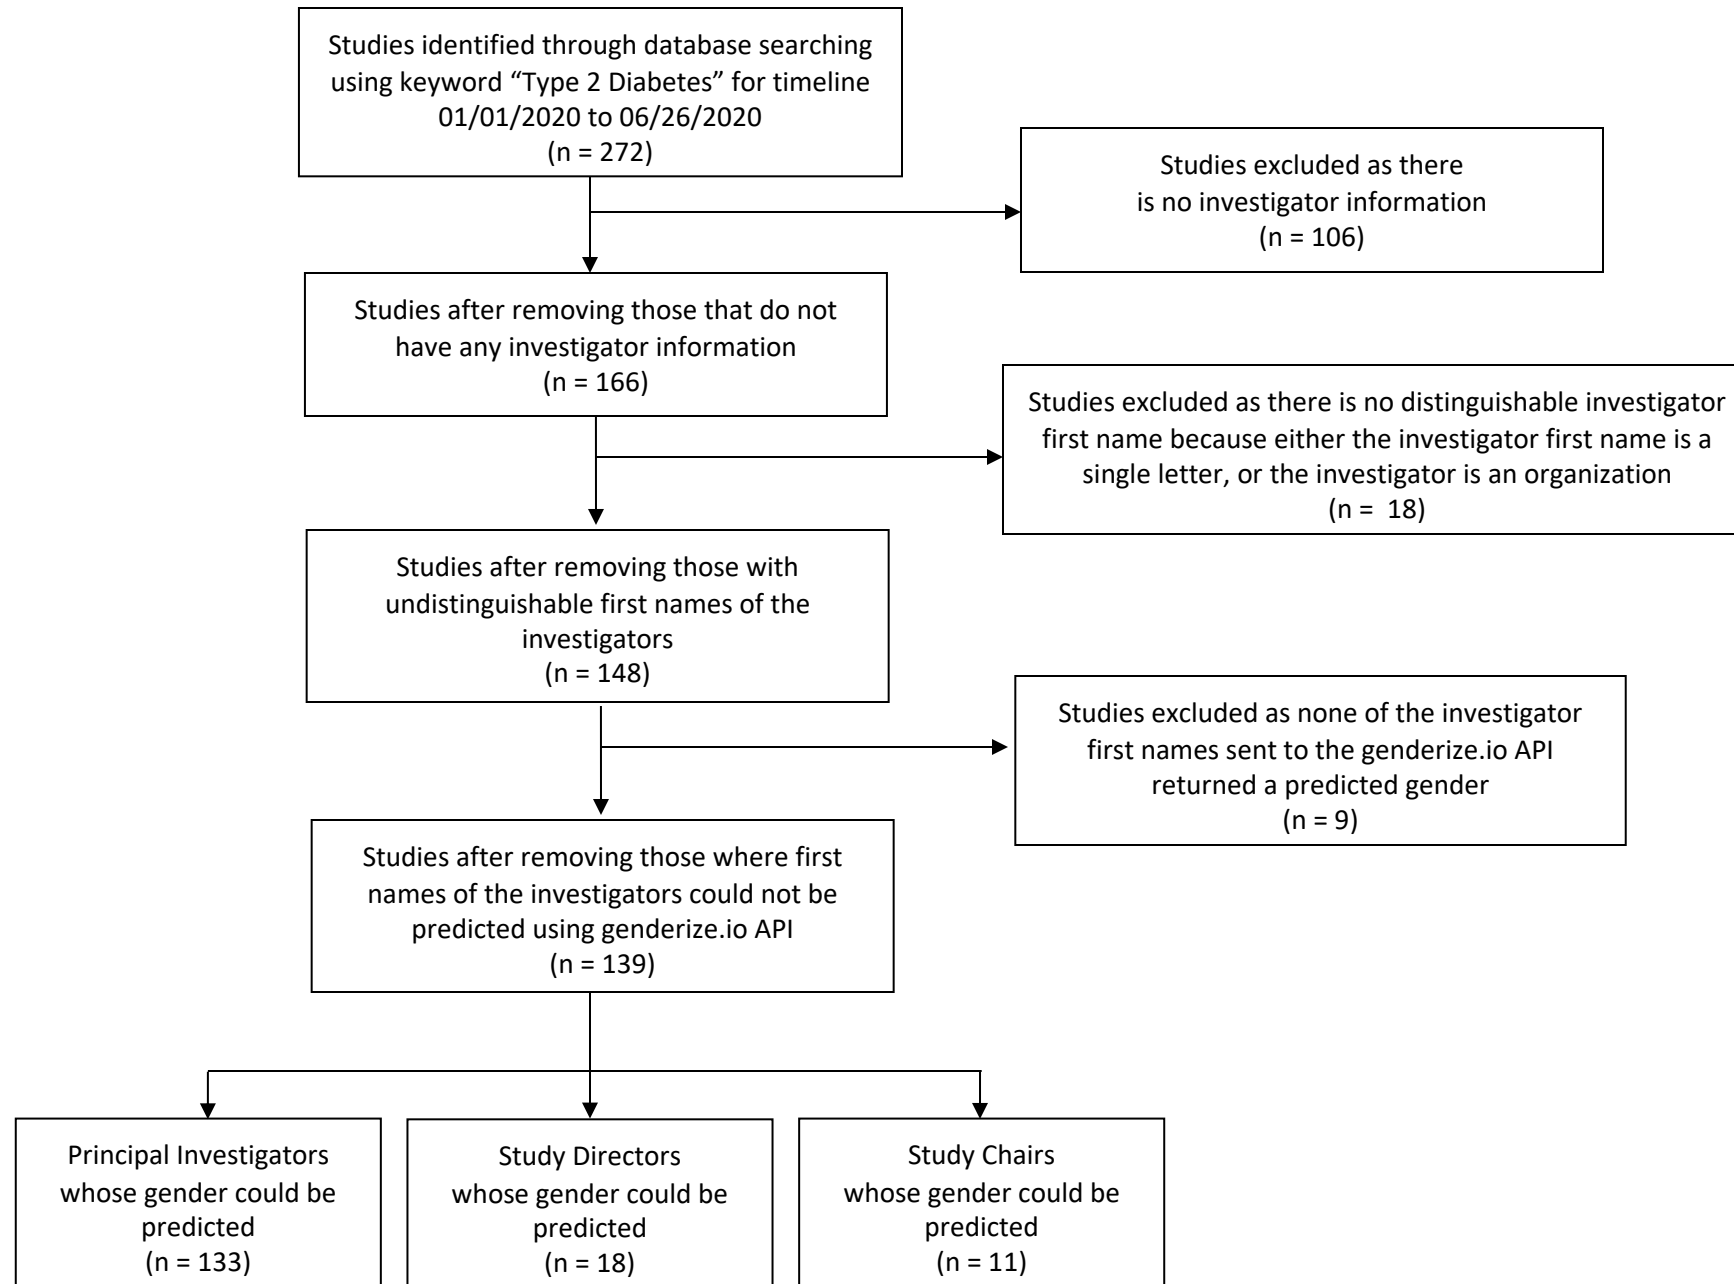

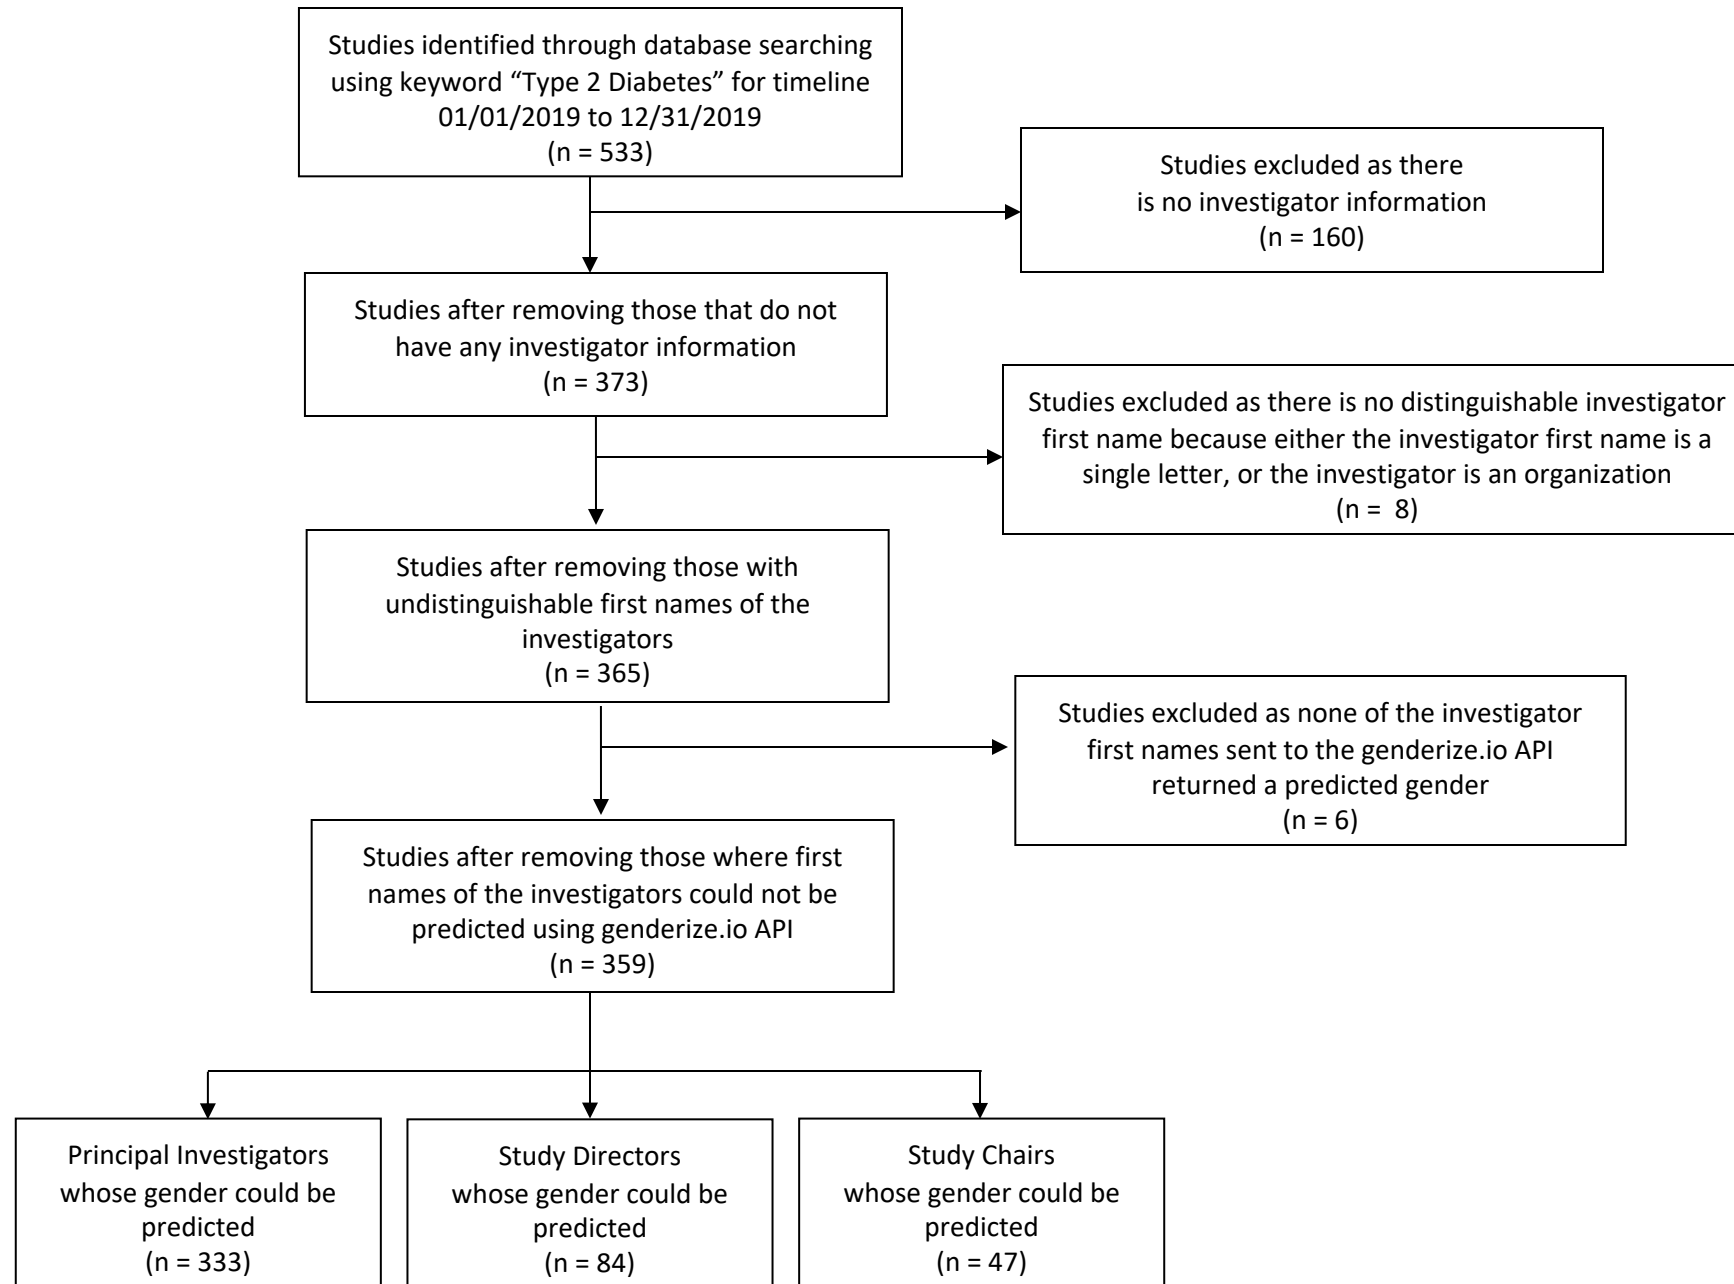

Supplement: Supplementary file [file 2020.08.02.20166751-1.pdf]
